# Supplementary material for: Association Between Testosterone Treatment and Risk of Incident Cardiovascular Events Among US Male Veterans With Low Testosterone Levels and Multiple Medical Comorbidities
Source: PubMed Central journal article supplement — J Am Heart Assoc. 2021 Aug 21;10(17):e020562. doi: 10.1161/JAHA.120.020562 (PMC8649267; doi:10.1161/jaha.120.020562), 2021-08-21
Supplement: JAH3-10-e020562-s001.pdf [file JAH3-10-e020562-s001.pdf]

## **Supplemental Material**

**Data S1. Case-crossover design comparing current and former testosterone treatment among those with a composite cardiovascular outcome.**

In this study design, subjects with a composite cardiovascular outcome serve as their own control at the selected times prior to the cardiovascular outcome. Testosterone treatment status (current or former) was determined at the time of the cardiovascular outcome and at 1, 3, and 6 months prior to the outcome. This design controls for non-time dependent factors including unmeasured in-person confounders. In this exploratory analysis, we did not consider further adjustments and our investigation was limited to those who had treatment during follow-up (to reduce the possibility of treatment bias) and who were either on current treatment or former treatment at the time prior to and at the time of the outcome. In addition, both modalities of treatment (intramuscular and transdermal) were combined into a single testosterone exposure.

The three tables below present the windows of testosterone treatment 1, 3, and 6 months prior to the composite cardiovascular outcome as the control. The table diagonals (former & former treatment and current & current treatment) contain the majority of the subjects, indicating that treatment status is relatively stable across the follow-up periods. These cells do not inform the analysis, as the subject is on the same treatment prior to the event and at the event. The subjects with *discordant* treatment status inform the case-crossover analysis: the case-crossover odds ratio is estimated by the ratio of the counts in the cells with discordant treatment status. For each control time period (1, 3, and 6 months), the estimated odds ratio (OR) was consistent with an association towards protection by current treatment rather than harm. The proportion of those on current treatment is lower at the time of the composite outcome than at control time prior to the composite outcome. McNemar’s test was used to test the null hypothesis of no association.

**Table 1. Testosterone treatment one month prior to composite outcome vs testosterone treatment at time of the composite outcome**

|                                   |         | Testosterone treatment 1 month prior to outcome |        |       |
|-----------------------------------|---------|-------------------------------------------------|--------|-------|
|                                   |         | Current                                         | Former | Total |
| Testosterone treatment at outcome | Current | 1023                                            | 293    | 1316  |
|                                   | Former  | 309                                             | 3203   | 3512  |
|                                   | Total   | 1332                                            | 3469   | 4828  |

Proportion of subjects on current treatment at time of composite outcome: 0.273

Proportion of subjects on Current treatment one month prior to composite outcome: 0.276

OR = 0.95 (95% CI: 0.81-1.12); p-value=0.51

**Table 2. Testosterone treatment three months prior to composite outcome vs testosterone treatment at time of the composite outcome**

|                                   |         | Testosterone treatment 3 months prior to outcome |        |       |
|-----------------------------------|---------|--------------------------------------------------|--------|-------|
|                                   |         | Current                                          | Former | Total |
| Testosterone treatment at outcome | Current | 935                                              | 351    | 1286  |
|                                   | Former  | 475                                              | 3010   | 3485  |
|                                   | Total   | 1410                                             | 3361   | 4771  |

Proportion of subjects on current treatment at time of composite outcome: 0.270

Proportion of subjects on current treatment three months prior to composite outcome: 0.296

OR = 0.74 (95% CI: 0.64-0.85); p-value <0.01

**Table 3. Testosterone treatment six months prior to composite outcome vs testosterone treatment at composite outcome**

|                                   |         | Testosterone treatment 6 months prior to outcome |        |       |
|-----------------------------------|---------|--------------------------------------------------|--------|-------|
|                                   |         | Current                                          | Former | Total |
| Testosterone treatment at outcome | Current | 836                                              | 371    | 1207  |
|                                   | Former  | 562                                              | 2839   | 3401  |
|                                   | Total   | 1398                                             | 3210   | 4608  |

Proportion of subjects on current treatment at time of composite outcome: 0.262

Proportion of subjects on current treatment six months prior to composite outcome: 0.303

OR = 0.66 (95% CI: 0.58-0.75); p-value <0.01

**Table S1. Criteria for Cardiovascular Outcomes**

| Cardiovascular Events       | ICD-9 Diagnostic Codes                                                                                                                                                                                                     | ICD-9 Procedure Code | CPT4#        | Internal Entry Number (IEN)*                                                                                                                                                                                                                                                                                                                                                                                                                                                                |
|-----------------------------|----------------------------------------------------------------------------------------------------------------------------------------------------------------------------------------------------------------------------|----------------------|--------------|---------------------------------------------------------------------------------------------------------------------------------------------------------------------------------------------------------------------------------------------------------------------------------------------------------------------------------------------------------------------------------------------------------------------------------------------------------------------------------------------|
| Myocardial infarction       | 410.0, 410.00-410.02, 410.1, 410.10-410.12, 410.2, 410.20-410.22, 410.3, 410.30-410.32, 410.4, 410.40-410.42, 410.5, 410.50-410.52, 410.6, 410.60-410.62, 410.7, 410.70-410.72, 410.8, 410.80-410.82, 410.9, 410.90-410.92 |                      |              |                                                                                                                                                                                                                                                                                                                                                                                                                                                                                             |
| Pulmonary embolism          | 415.1, 415.11, 415.13, 415.19                                                                                                                                                                                              |                      |              |                                                                                                                                                                                                                                                                                                                                                                                                                                                                                             |
| Deep vein thrombosis (DVT)^ | 451.1, 451.11, 451.19, 451.2, 451.8, 451.81-451.84, 451.89, 451.9, 453.0, 453.1, 453.2, 453.40-453.42, 453.8, 453.81-453.87, 453.89, 453.9                                                                                 | 38.7                 | 75940, 75941 | 11785, 12935, 12938, 13678, 15894, 17111, 18874, 18877, 21208, 21213, 21214, 21215, 22021, 22022, 22575, 22765, 4653, 4654, 4658, 4660, 12362, 12932, 13675, 13676, 15440, 15895, 15896, 17183, 18878, 21207, 21209, 21210, 21212, 22573, 22764, 22766, 4652, 4656, 11784, 11787, 12936, 13624, 13625, 13674, 13677, 13679, 15439, 17110, 17112, 18876, 19109, 21211, 22019, 22020, 4650, 4651, 4657, 4659, 11783, 11786, 12360, 12361, 12933, 12934, 14609, 15480, 22763, 4655, 5592, 5593 |
| Stroke                      | 433.01, 433.11, 433.21, 433.31, 433.81, 433.91, 434.01, 434.11, 434.91, 436                                                                                                                                                |                      |              |                                                                                                                                                                                                                                                                                                                                                                                                                                                                                             |

#CPT: Current procedural terminology procedure code

\*IEN (internal entry number) for VHA pharmacy data for anticoagulants.

^ Criteria for DVT required both an ICD-9 diagnostic code and either inferior vena cava filter placement or anticoagulation treatment

**Table S2. Covariate Codes**

| Characteristic                     | Based on                                                                                                  | Codes                                                                                                                                                                                                                                                                                                                                                                                                                                                                                                                                                                                                                                                                                                                                                                                                                                                                                                                                                                                                                                                                                                                                                                                                                                                                                                                                                                                                                                                                                                                                                                                                                                                                                                                                                        |
|------------------------------------|-----------------------------------------------------------------------------------------------------------|--------------------------------------------------------------------------------------------------------------------------------------------------------------------------------------------------------------------------------------------------------------------------------------------------------------------------------------------------------------------------------------------------------------------------------------------------------------------------------------------------------------------------------------------------------------------------------------------------------------------------------------------------------------------------------------------------------------------------------------------------------------------------------------------------------------------------------------------------------------------------------------------------------------------------------------------------------------------------------------------------------------------------------------------------------------------------------------------------------------------------------------------------------------------------------------------------------------------------------------------------------------------------------------------------------------------------------------------------------------------------------------------------------------------------------------------------------------------------------------------------------------------------------------------------------------------------------------------------------------------------------------------------------------------------------------------------------------------------------------------------------------|
| Cardiac Arrhythmia                 | ICD-9 codes                                                                                               | ICD-9 codes: 426.xx, 427.xx                                                                                                                                                                                                                                                                                                                                                                                                                                                                                                                                                                                                                                                                                                                                                                                                                                                                                                                                                                                                                                                                                                                                                                                                                                                                                                                                                                                                                                                                                                                                                                                                                                                                                                                                  |
| Cardiomyopathy                     | ICD-9 codes                                                                                               | ICD-9 codes: 425.xx                                                                                                                                                                                                                                                                                                                                                                                                                                                                                                                                                                                                                                                                                                                                                                                                                                                                                                                                                                                                                                                                                                                                                                                                                                                                                                                                                                                                                                                                                                                                                                                                                                                                                                                                          |
| Cerebrovascular Disease            | ICD-9 codes                                                                                               | ICD-9 codes: 38.11, 430.x, 431.x, 434.x, 435.x, 436; 437, 437.0, 437.1, 437.8, 437.9, V12.54                                                                                                                                                                                                                                                                                                                                                                                                                                                                                                                                                                                                                                                                                                                                                                                                                                                                                                                                                                                                                                                                                                                                                                                                                                                                                                                                                                                                                                                                                                                                                                                                                                                                 |
| Chronic Heart Failure              | ICD-9 codes                                                                                               | ICD-9 codes: 428.xx, 398.91                                                                                                                                                                                                                                                                                                                                                                                                                                                                                                                                                                                                                                                                                                                                                                                                                                                                                                                                                                                                                                                                                                                                                                                                                                                                                                                                                                                                                                                                                                                                                                                                                                                                                                                                  |
| Chronic Kidney Disease             | ICD-9 codes or LOINC <sup>#</sup> for GFR* $\leq$ 45                                                      | ICD-9 codes: 585, 585.3x, 585.4x, 585.5x, 585.6x, 585.9x<br>LOINC: 62238-1, 33914-3, 48642-3, 48643-1, 70969-1, 50384-7                                                                                                                                                                                                                                                                                                                                                                                                                                                                                                                                                                                                                                                                                                                                                                                                                                                                                                                                                                                                                                                                                                                                                                                                                                                                                                                                                                                                                                                                                                                                                                                                                                      |
| Chronic Liver Failure              | ICD-9 codes                                                                                               | ICD-9 codes: 456.0, 456.1, 456.2x, 571.2, 571.3, 571.40, 571.41, 571.42, 571.49, 571.5, 571.6, 571.8, 571.9, 572.2, 572.3, 572.4, 572.8                                                                                                                                                                                                                                                                                                                                                                                                                                                                                                                                                                                                                                                                                                                                                                                                                                                                                                                                                                                                                                                                                                                                                                                                                                                                                                                                                                                                                                                                                                                                                                                                                      |
| COPD <sup>-</sup>                  | ICD-9 codes                                                                                               | ICD-9 codes: 491.2x, 492.xx, 493.xx, 496.xx                                                                                                                                                                                                                                                                                                                                                                                                                                                                                                                                                                                                                                                                                                                                                                                                                                                                                                                                                                                                                                                                                                                                                                                                                                                                                                                                                                                                                                                                                                                                                                                                                                                                                                                  |
| Coronary artery disease and angina | ICD-9 codes or CPT <sup>§</sup> codes                                                                     | ICD-9 codes: 411.1, 411.8, 411.81, 411.89, 412.xx, 414.4, 414.8, 414.9; 413.0, 413.1, 413.9<br>ICD-9 procedure codes: 36.0-36.17, 36.19, 36.2<br>CPT codes: 33510-14, 33516- 33523, 33525, 33528, 92980- 92982, 92984                                                                                                                                                                                                                                                                                                                                                                                                                                                                                                                                                                                                                                                                                                                                                                                                                                                                                                                                                                                                                                                                                                                                                                                                                                                                                                                                                                                                                                                                                                                                        |
| Diabetes                           | ICD-9 codes or IEN <sup>&amp;</sup> for insulin and oral hypoglycemics or LOINC for HbA <sub>1c</sub> > 6 | ICD-9 codes: 250.xx, 362.0x<br>IEN: 22955, 17238, 17239, 14371, 14913, 16264, 16280, 17587, 18029, 19354, 20717, 822, 826, 829, 831, 834, 838, 841, 845, 846, 850, 852, 858, 862, 863, 868, 873, 874, 879, 880, 886, 888, 889, 891, 13113, 13485, 16265, 16466, 16467, 16746, 17588, 18242, 18243, 18690, 823, 824, 828, 836, 837, 842, 844, 853, 856, 867, 869, 871, 875, 882, 885, 890, 13351, 13484, 14591, 14592, 16199, 16200, 16437, 16665, 17851, 18590, 19355, 825, 827, 839, 840, 851, 854, 855, 857, 859, 860, 864, 866, 870, 877, 881, 883, 884, 887, 13352, 13353, 13486, 14476, 14477, 16263, 16370, 17849, 17850, 17894, 19356, 20714, 821, 830, 832, 833, 835, 843, 847, 848, 849, 861, 865, 872, 876, 878, 892, 12469, 12485, 13579, 14537, 15347, 15983, 16137, 17220, 1780, 18086, 18282, 1836, 19238, 2079, 21861, 22043, 22947, 23321, 23629, 23631, 23632, 23638, 23797, 4519, 12369, 12470, 12472, 12483, 12484, 12594, 12766, 13507, 13508, 13580, 13581, 13712, 13713, 13714, 14538, 14620, 15981, 15982, 16125, 16139, 17926, 18281, 1837, 19239, 2078, 20859, 22946, 22948, 22959, 23796, 2877, 576, 12468, 12471, 12592, 12593, 12768, 12901, 12976, 13875, 14539, 14941, 16635, 16711, 1779, 1781, 1782, 17912, 18006, 18009, 20177, 21862, 22042, 22389, 22732, 22733, 22958, 22960, 23333, 23623, 23624, 23630, 23637, 2876, 2879, 2880, 4518, 4520, 4521, 12370, 12767, 12899, 12900, 13509, 14319, 14940, 16124, 16126, 16138, 17191, 17542, 17543, 17925, 17927, 18007, 18008, 18010, 18011, 18085, 19240, 20559, 20561, 20858, 22041, 22731, 23332, 23622, 23628, 23633, 2878, 2881, 577, 21531, 17188, 19123, 19375, 19124, 19125<br>LOINC: 41995-2, 55454-3, 4548-4, 4549-2, 17855-8, 17856-6, 59261-8, 71875-9, 62388-4 |
| Sexual Dysfunction                 | ICD-9 codes or                                                                                            | ICD-9 codes: 302.70, 302.71, 302.72, 302.74, 302.75, 302.76, 607.84, 799.81                                                                                                                                                                                                                                                                                                                                                                                                                                                                                                                                                                                                                                                                                                                                                                                                                                                                                                                                                                                                                                                                                                                                                                                                                                                                                                                                                                                                                                                                                                                                                                                                                                                                                  |

|                             |                                                            |                                                                                                                                                                                                                                                                                                                                                                                                                                                                                                                                                                                                                                                                                                                                                                                                                                                                                                                                                                                                                                                                                                                                                                                                                 |
|-----------------------------|------------------------------------------------------------|-----------------------------------------------------------------------------------------------------------------------------------------------------------------------------------------------------------------------------------------------------------------------------------------------------------------------------------------------------------------------------------------------------------------------------------------------------------------------------------------------------------------------------------------------------------------------------------------------------------------------------------------------------------------------------------------------------------------------------------------------------------------------------------------------------------------------------------------------------------------------------------------------------------------------------------------------------------------------------------------------------------------------------------------------------------------------------------------------------------------------------------------------------------------------------------------------------------------|
| Sexual Dysfunction (con)    | IENs for medications for erectile dysfunction              | IENs: 16380, 16384, 12823, 16381, 16385, 16522, 20312, 22644, 12822, 12824, 16520, 16521, 16379, 16382, 16383, 16146, 2956, IENs: 2957, 2962, 2963, 2954, 2961, 2964, 16147, 16509, 2955, 2965, 16148, 16508, 2958, 2959, 2960, 2966                                                                                                                                                                                                                                                                                                                                                                                                                                                                                                                                                                                                                                                                                                                                                                                                                                                                                                                                                                            |
| Hyperlipidemia              | ICD-9 codes or IENs for lipid-lowering medications         | ICD-9 codes: 272.0x, 272.1x, 272.2x<br>IENs: 13591, 18377, 22009, 5850, 5851, 5854, 5856, 5859, 5861, 5862, 5864, 6227, 13589, 18376, 18378, 21539, 22008, 22010, 5846, 5853, 5860, 6223, 13592, 17507, 21541, 5847, 5855, 5857, 5858, 6226, 13588, 13590, 21540, 5848, 5849, 5852, 5863, 6224, 6225, 11937, 12860, 12861, 13578, 14096, 14585, 14760, 15318, 15470, 15866, 16386, 16389, 16400, 16403, 16531, 16775, 16776, 16880, 17012, 17338, 17552, 18969, 19385, 21013, 23564, 2907, 5098, 5238, 6115, 6116, 6118, 7994, 12596, 14759, 15317, 15865, 16004, 16390, 16392, 16405, 16442, 16532, 16877, 16879, 16882, 16883, 16885, 17013, 17335, 17336, 19374, 19386, 19387, 19510, 19636, 20339, 21312, 21729, 23572, 23859, 23860, 2906, 2908, 2909, 6114, 6119, 8519, 9680, 9741, 12595, 12597, 13788, 14321, 14618, 16135, 16244, 16387, 16391, 16404, 16881, 16884, 18040, 19527, 20340, 21014, 21310, 21311, 21867, 23735, 23858, 2910, 5239, 6117, 8520, 9743, 9744, 11938, 12831, 12914, 13725, 14527, 14594, 14960, 15864, 16003, 16388, 16401, 16402, 16530, 16777, 16878, 17334, 17337, 18970, 19366, 19526, 19637, 21509, 21866, 23563, 23565, 23864, 4436, 5097, 6113, 8521, 9681, 9682, 9742 |
| Hypertension                | ICD-9 codes                                                | ICD-9 codes: 401.xx, 402.xx, 403.xx, 404.xx, 405.xx                                                                                                                                                                                                                                                                                                                                                                                                                                                                                                                                                                                                                                                                                                                                                                                                                                                                                                                                                                                                                                                                                                                                                             |
| Major Depression            | ICD-9 codes                                                | ICD-9 codes: 296.2x-296.3x                                                                                                                                                                                                                                                                                                                                                                                                                                                                                                                                                                                                                                                                                                                                                                                                                                                                                                                                                                                                                                                                                                                                                                                      |
| Malignancy                  | ICD-9 codes                                                | ICD-9 codes: 140.xx-239.xx (except excluded basal cell cancer: 173.xx)                                                                                                                                                                                                                                                                                                                                                                                                                                                                                                                                                                                                                                                                                                                                                                                                                                                                                                                                                                                                                                                                                                                                          |
| Morbid Obesity              | ICD-9 codes                                                | ICD-9 codes: V85.4x, 278.01                                                                                                                                                                                                                                                                                                                                                                                                                                                                                                                                                                                                                                                                                                                                                                                                                                                                                                                                                                                                                                                                                                                                                                                     |
| Peripheral Vascular Disease | ICD-9 codes or CPT codes                                   | ICD-9 codes: 38.18, 38.19, 38.38, 38.39, 38.48, 38.49, 38.88, 38.89, 39.25, 39.26, 39.28, 39.29, 39.50, 39.90, 433, 433.9, 440.2x, 440.3x, 440.4x, 442.x, 443.x, 445.0x<br>CPT codes: 34800, 34802, 34803, 34804, 34805, 35226, 35256, 35286, 35351, 35355, 35371, 35372, 35381, 35454, 35456, 35459, 35473, 35474, 35482, 35483, 35485, 35492, 35493, 35495, 35546, 35548, 35549, 35551, 35556, 35558, 35563, 35565, 35566, 35571, 35583, 35585, 35587, 35646, 35656, 35661, 35663, 35665, 35666, 35671                                                                                                                                                                                                                                                                                                                                                                                                                                                                                                                                                                                                                                                                                                        |
| Polycythemia                | ICD-9 codes or LOINC codes for Hematocrit $\geq 52$        | ICD-9 codes: 289.0x<br>LOINC codes: 24360-0, 4544-3, 71833-8, 4545-0, 48703-3, 20570-8, 41655-2, 71830-4, 31100-1                                                                                                                                                                                                                                                                                                                                                                                                                                                                                                                                                                                                                                                                                                                                                                                                                                                                                                                                                                                                                                                                                               |
| PSA <sup>+</sup>            | LOINC laboratory codes                                     | LOINC codes: 19195-7, 19197-3, 2857-1, 35741-8, 10886-0, 19201-3, 19203-9, 12841-3, 14120-0, 33667-7, 15323-9, 15324-7, 15325-4                                                                                                                                                                                                                                                                                                                                                                                                                                                                                                                                                                                                                                                                                                                                                                                                                                                                                                                                                                                                                                                                                 |
| Sleep Apnea                 | ICD-9 codes or CPT codes for CPAP <sup>+</sup>             | ICD-9 codes: 780.51, 780.53, 780.57<br>CPT codes: E0452, E0601, 94660                                                                                                                                                                                                                                                                                                                                                                                                                                                                                                                                                                                                                                                                                                                                                                                                                                                                                                                                                                                                                                                                                                                                           |
| Smoking                     | ICD-9 codes or IEN codes for smoking cessation medications | ICD-9 codes: V15.82, 305.1x, 989.84<br>IENs: 17847, 23100, 9697, 9703, 16376, 18746, 18749, 22944, 5095, 9700, 9701, 16375, 17845, 18747, 5096, 9696, 13203, 16685, 17846, 17848, 18748, 22943, 9694, 9695, 9698, 9699, 9702                                                                                                                                                                                                                                                                                                                                                                                                                                                                                                                                                                                                                                                                                                                                                                                                                                                                                                                                                                                    |

|                           |                                       |                                                                                                                                                                                                                                                                                                                                                                                                                   |
|---------------------------|---------------------------------------|-------------------------------------------------------------------------------------------------------------------------------------------------------------------------------------------------------------------------------------------------------------------------------------------------------------------------------------------------------------------------------------------------------------------|
| Testosterone Formulations | IEN for testosterone medications      | IENs: 513, 514, 515, 516, 518, 524, 525, 526, 527, 530, 531, 532, 533, 534, 14379, 14380, 14775, 15507, 15508, 16064, 16544, 17475, 17503, 17901, 21468, 21470, 21471, 22219, 22384, 22523, 22526, 22791, 168, 169, 170, 171, 172, 173, 174, 512, 517, 519, 520, 521, 522, 523, 528, 529, 1301, 1302, 1303, 3055, 3637, 3638, 3639, 3795, 4220, 4550, 4551, 4552, 4553, 4554, 4555, 4556, 6577, 6578, 6976, 16141 |
| Testosterone Level        | LOINC for serum testosterone measures | LOINC: 14913-8, 1639-4, 21555-8, 2986-8, 49041-7, 49042-7, 55519-3, 58835-0, 70239-9, 51005-7, 58716-2, 49042-5, 49043-3, 70240-7, 58952-3, 2990-0, 30123-4, 14914-6, 25987-9, 2991-8, 35225-2, 24125-7, 15432-8, 16286-7, 17686-7                                                                                                                                                                                |

~COPD: Chronic obstructive pulmonary disease

^CPAP: Continuous positive airway pressure

§CPT: Current procedural terminology procedure code

\*GFR: Glomerular filtration rate

&IEN: Internal Entry Numbers for medications,

#LOINC: Logical observation identifiers names and codes for laboratory data

+PSA: Prostate specific antigen

**Table S3. Results using different definitions for current testosterone treatment**

|                          |         | Adjusted HR (No Prevalent CVD at cohort entry) |                  |                  |                  |                  |                  |                  |
|--------------------------|---------|------------------------------------------------|------------------|------------------|------------------|------------------|------------------|------------------|
| TD Treatment             |         | No overrun                                     | 10%              | 20%*             | 25%              | 30%              | 35%              | 40%              |
| Composite                | Former  | 1.00 (ref)                                     | 1.00 (ref)       | 1.00 (ref)       | 1.00 (ref)       | 1.00 (ref)       | 1.00 (ref)       | 1.00 (ref)       |
| Cardiovascular Endpoint# | Current | 0.89 (0.74-1.05)                               | 0.87 (0.74-1.03) | 0.89 (0.76-1.05) | 0.88 (0.75-1.04) | 0.88 (0.75-1.04) | 0.89 (0.76-1.05) | 0.90 (0.77-1.05) |
|                          | No use  | 1.02 (0.94-1.11)                               | 1.01 (0.93-1.1)  | 1.02 (0.94-1.11) | 1.02 (0.93-1.10) | 1.02 (0.93-1.10) | 1.02 (0.93-1.11) | 1.02 (0.94-1.11) |
| MI                       | Former  | 1.00 (ref)                                     | 1.00 (ref)       | 1.00 (ref)       | 1.00 (ref)       | 1.00 (ref)       | 1.00 (ref)       | 1.00 (ref)       |
|                          | Current | 0.91 (0.72-1.16)                               | 0.88 (0.7-1.11)  | 0.92 (0.73-1.15) | 0.90 (0.72-1.13) | 0.90 (0.72-1.12) | 0.90 (0.72-1.13) | 0.88 (0.70-1.10) |
|                          | No use  | 1.07 (0.95-1.19)                               | 1.06 (0.94-1.18) | 1.06 (0.95-1.19) | 1.06 (0.95-1.19) | 1.06 (0.94-1.19) | 1.06 (0.94-1.19) | 1.05 (0.94-1.18) |
| Stroke                   | Former  | 1.00 (ref)                                     | 1.00 (ref)       | 1.00 (ref)       | 1.00 (ref)       | 1.00 (ref)       | 1.00 (ref)       | 1.00 (ref)       |
|                          | Current | 1 (0.71-1.41)                                  | 0.98 (0.7-1.37)  | 0.96 (0.69-1.34) | 0.93 (0.67-1.29) | 0.91 (0.65-1.27) | 0.89 (0.64-1.24) | 0.91 (0.66-1.26) |
|                          | No use  | 1.07 (0.91-1.26)                               | 1.06 (0.9-1.26)  | 1.06 (0.90-1.25) | 1.05 (0.89-1.24) | 1.05 (0.89-1.24) | 1.04 (0.88-1.23) | 1.05 (0.88-1.24) |
| VTE                      | Former  | 1.00 (ref)                                     | 1.00 (ref)       | 1.00 (ref)       | 1.00 (ref)       | 1.00 (ref)       | 1.00 (ref)       | 1.00 (ref)       |
|                          | Current | 0.7 (0.49-1.01)                                | 0.73 (0.52-1.04) | 0.75 (0.53-1.05) | 0.77 (0.55-1.07) | 0.80 (0.57-1.11) | 0.82 (0.60-1.14) | 0.89 (0.65-1.21) |
|                          | No use  | 0.86 (0.72-1.01)                               | 0.86 (0.73-1.01) | 0.86 (0.73-1.02) | 0.87 (0.73-1.03) | 0.87 (0.73-1.03) | 0.88 (0.74-1.04) | 0.89 (0.75-1.06) |
| <b>IM Treatment</b>      |         |                                                |                  |                  |                  |                  |                  |                  |
| Composite                | Former  | 1.00 (ref)                                     | 1.00 (ref)       | 1.00 (ref)       | 1.00 (ref)       | 1.00 (ref)       | 1.00 (ref)       | 1.00 (ref)       |
| Cardiovascular Endpoint# | Current | 0.91 (0.8-1.04)                                | 0.91 (0.8-1.04)  | 0.91 (0.80-1.04) | 0.89 (0.79-1.01) | 0.89 (0.79-1.01) | 0.90 (0.79-1.02) | 0.90 (0.80-1.02) |
|                          | No use  | 0.82 (0.76-0.89)                               | 0.82 (0.76-0.89) | 0.82 (0.75-0.89) | 0.81 (0.75-0.89) | 0.81 (0.75-0.89) | 0.81 (0.75-0.89) | 0.81 (0.75-0.89) |
| MI                       | Former  | 1.00 (ref)                                     | 1.00 (ref)       | 1.00 (ref)       | 1.00 (ref)       | 1.00 (ref)       | 1.00 (ref)       | 1.00 (ref)       |
|                          | Current | 0.93 (0.78-1.1)                                | 0.95 (0.8-1.13)  | 0.95 (0.80-1.13) | 0.93 (0.78-1.10) | 0.93 (0.79-1.11) | 0.95 (0.80-1.12) | 0.95 (0.81-1.13) |
|                          | No use  | 0.83 (0.74-0.93)                               | 0.84 (0.75-0.94) | 0.84 (0.75-0.94) | 0.83 (0.74-0.93) | 0.83 (0.74-0.93) | 0.83 (0.74-0.94) | 0.84 (0.74-0.94) |
| Stroke                   | Former  | 1.00 (ref)                                     | 1.00 (ref)       | 1.00 (ref)       | 1.00 (ref)       | 1.00 (ref)       | 1.00 (ref)       | 1.00 (ref)       |
|                          | Current | 0.97 (0.75-1.27)                               | 0.95 (0.73-1.23) | 0.95 (0.73-1.23) | 0.92 (0.71-1.19) | 0.94 (0.73-1.22) | 0.95 (0.74-1.23) | 0.93 (0.72-1.20) |
|                          | No use  | 0.87 (0.73-1.03)                               | 0.86 (0.73-1.02) | 0.86 (0.72-1.02) | 0.85 (0.72-1.01) | 0.86 (0.72-1.02) | 0.86 (0.72-1.03) | 0.85 (0.72-1.02) |
| VTE                      | Former  | 1.00 (ref)                                     | 1.00 (ref)       | 1.00 (ref)       | 1.00 (ref)       | 1.00 (ref)       | 1.00 (ref)       | 1.00 (ref)       |
|                          | Current | 0.8 (0.61-1.05)                                | 0.78 (0.59-1.02) | 0.77 (0.59-1.00) | 0.76 (0.58-1.00) | 0.74 (0.57-0.97) | 0.74 (0.56-0.96) | 0.75 (0.57-0.98) |
|                          | No use  | 0.73 (0.61-0.87)                               | 0.72 (0.6-0.86)  | 0.71 (0.60-0.85) | 0.71 (0.60-0.85) | 0.70 (0.59-0.84) | 0.70 (0.59-0.84) | 0.70 (0.59-0.84) |



| TD Treatment                       |         | Adjusted HR (Prevalent CVD at cohort entry) |                  |                  |                  |                  |                  |                  |
|------------------------------------|---------|---------------------------------------------|------------------|------------------|------------------|------------------|------------------|------------------|
|                                    |         | No overrun                                  | 10%              | 20%*             | 25%              | 30%              | 35%              | 40%              |
| Composite Cardiovascular Endpoint# | Former  | 1.00 (ref)                                  | 1.00 (ref)       | 1.00 (ref)       | 1.00 (ref)       | 1.00 (ref)       | 1.00 (ref)       | 1.00 (ref)       |
|                                    | Current | 0.81 (0.7-0.93)                             | 0.81 (0.7-0.92)  | 0.80 (0.70-0.91) | 0.83 (0.73-0.95) | 0.84 (0.73-0.95) | 0.85 (0.75-0.96) | 0.87 (0.77-0.99) |
|                                    | No use  | 1.04 (0.98-1.1)                             | 1.03 (0.97-1.09) | 1.03 (0.97-1.09) | 1.03 (0.97-1.1)  | 1.04 (0.98-1.1)  | 1.04 (0.98-1.1)  | 1.04 (0.98-1.11) |
| MI                                 | Former  | 1.00 (ref)                                  | 1.00 (ref)       | 1.00 (ref)       | 1.00 (ref)       | 1.00 (ref)       | 1.00 (ref)       | 1.00 (ref)       |
|                                    | Current | 0.81 (0.67-0.97)                            | 0.83 (0.69-0.99) | 0.80 (0.67-0.95) | 0.8 (0.68-0.96)  | 0.81 (0.69-0.96) | 0.82 (0.69-0.97) | 0.84 (0.71-0.99) |
|                                    | No use  | 1.07 (1-1.16)                               | 1.07 (1-1.16)    | 1.07 (0.99-1.15) | 1.07 (0.99-1.15) | 1.07 (0.99-1.15) | 1.07 (0.99-1.16) | 1.07 (1-1.16)    |
| Stroke                             | Former  | 1.00 (ref)                                  | 1.00 (ref)       | 1.00 (ref)       | 1.00 (ref)       | 1.00 (ref)       | 1.00 (ref)       | 1.00 (ref)       |
|                                    | Current | 0.92 (0.72-1.17)                            | 0.9 (0.71-1.14)  | 0.90 (0.72-1.14) | 0.94 (0.75-1.18) | 0.94 (0.75-1.18) | 0.97 (0.78-1.21) | 0.99 (0.8-1.23)  |
|                                    | No use  | 1.05 (0.95-1.17)                            | 1.05 (0.95-1.16) | 1.05 (0.94-1.16) | 1.06 (0.95-1.17) | 1.05 (0.95-1.17) | 1.06 (0.95-1.18) | 1.07 (0.96-1.18) |
| VTE                                | Former  | 1.00 (ref)                                  | 1.00 (ref)       | 1.00 (ref)       | 1.00 (ref)       | 1.00 (ref)       | 1.00 (ref)       | 1.00 (ref)       |
|                                    | Current | 0.73 (0.55-0.96)                            | 0.7 (0.53-0.92)  | 0.72 (0.55-0.94) | 0.75 (0.58-0.98) | 0.78 (0.6-1)     | 0.78 (0.6-1)     | 0.82 (0.64-1.05) |
|                                    | No use  | 0.93 (0.83-1.04)                            | 0.93 (0.83-1.04) | 0.93 (0.83-1.04) | 0.93 (0.83-1.04) | 0.94 (0.83-1.05) | 0.93 (0.83-1.05) | 0.94 (0.84-1.06) |
| <b>IM Treatment</b>                |         |                                             |                  |                  |                  |                  |                  |                  |
| Composite Cardiovascular Endpoint# | Former  | 1.00 (ref)                                  | 1.00 (ref)       | 1.00 (ref)       | 1.00 (ref)       | 1.00 (ref)       | 1.00 (ref)       | 1.00 (ref)       |
|                                    | Current | 0.99 (0.9-1.1)                              | 0.99 (0.9-1.09)  | 0.98 (0.89-1.09) | 0.97 (0.88-1.07) | 0.97 (0.88-1.07) | 0.97 (0.88-1.06) | 0.97 (0.88-1.06) |
|                                    | No use  | 0.96 (0.9-1.02)                             | 0.96 (0.9-1.02)  | 0.96 (0.90-1.02) | 0.95 (0.89-1.01) | 0.95 (0.89-1.01) | 0.95 (0.89-1.01) | 0.95 (0.89-1.01) |
| MI                                 | Former  | 1.00 (ref)                                  | 1.00 (ref)       | 1.00 (ref)       | 1.00 (ref)       | 1.00 (ref)       | 1.00 (ref)       | 1.00 (ref)       |
|                                    | Current | 0.99 (0.87-1.13)                            | 1 (0.88-1.13)    | 0.99 (0.87-1.12) | 0.97 (0.86-1.1)  | 0.97 (0.85-1.09) | 0.97 (0.85-1.09) | 0.97 (0.86-1.1)  |
|                                    | No use  | 0.96 (0.89-1.04)                            | 0.97 (0.89-1.05) | 0.97 (0.89-1.04) | 0.96 (0.88-1.04) | 0.96 (0.88-1.04) | 0.96 (0.88-1.04) | 0.96 (0.88-1.04) |
| Stroke                             | Former  | 1.00 (ref)                                  | 1.00 (ref)       | 1.00 (ref)       | 1.00 (ref)       | 1.00 (ref)       | 1.00 (ref)       | 1.00 (ref)       |
|                                    | Current | 0.89 (0.74-1.08)                            | 0.89 (0.74-1.07) | 0.87 (0.73-1.05) | 0.86 (0.72-1.04) | 0.9 (0.75-1.07)  | 0.91 (0.76-1.08) | 0.9 (0.75-1.07)  |
|                                    | No use  | 0.95 (0.85-1.05)                            | 0.94 (0.85-1.05) | 0.94 (0.84-1.04) | 0.93 (0.83-1.04) | 0.94 (0.84-1.05) | 0.94 (0.84-1.05) | 0.94 (0.84-1.05) |
| VTE                                | Former  | 1.00 (ref)                                  | 1.00 (ref)       | 1.00 (ref)       | 1.00 (ref)       | 1.00 (ref)       | 1.00 (ref)       | 1.00 (ref)       |
|                                    | Current | 0.96 (0.78-1.18)                            | 0.96 (0.78-1.17) | 0.97 (0.79-1.18) | 0.96 (0.79-1.17) | 0.96 (0.79-1.17) | 0.94 (0.78-1.15) | 0.97 (0.8-1.18)  |
|                                    | No use  | 0.94 (0.83-1.07)                            | 0.94 (0.83-1.07) | 0.94 (0.83-1.07) | 0.94 (0.83-1.07) | 0.94 (0.83-1.07) | 0.93 (0.82-1.06) | 0.94 (0.83-1.07) |

Results using different definitions for current testosterone treatment with an overrun ranging from none to 40% of prescription duration. Current testosterone is defined as prescription duration plus a 20% overrun. An overrun was included to account for refill times, noncompliance or residual effects. This sensitivity analysis varies the overrun from 0-40%.

\* 20% overrun is the definition for current testosterone treatment that is used in the paper.

#The composite cardiovascular endpoint was comprised of MI, stroke and VTE.

**Table S4. Incidence rates (IR) associated with testosterone initiation during continuous treatment with testosterone<sup>#</sup>**

| <b>MI</b>                                                                                                               | Continuous treatment time                  | PY/1000 | Events | IR (95% CI)       |
|-------------------------------------------------------------------------------------------------------------------------|--------------------------------------------|---------|--------|-------------------|
| <b>TD*</b>                                                                                                              | -All continuous treatment time             | 8.5     | 64     | 7.51 (5.87-9.59)  |
|                                                                                                                         | -1 <sup>st</sup> Year continuous treatment | 8.4     | 64     | 7.65 (5.99-9.78)  |
|                                                                                                                         | - 6 Months continuous treatment            | 7.8     | 63     | 8.03 (6.28-10.29) |
|                                                                                                                         | - 3 Months continuous treatment            | 6.6     | 52     | 7.92 (6.03-10.40) |
| <b>IM<sup>+</sup></b>                                                                                                   | - All continuous treatment time            | 13.1    | 113    | 8.62 (7.17-10.37) |
|                                                                                                                         | -1 <sup>st</sup> Year continuous treatment | 12.0    | 101    | 8.41 (6.92-10.22) |
|                                                                                                                         | - 6 Months continuous treatment            | 10.0    | 87     | 8.71 (7.06-10.75) |
|                                                                                                                         | - 3 Months                                 | 7.0     | 61     | 8.69 (6.76-11.17) |
| * IR = 6.49 for current-use of TD in the primary analysis;<br>+ IR = 8.16 for current-use of IM in the primary analysis |                                            |         |        |                   |
| <b>STROKE</b>                                                                                                           | Continuous treatment time                  | PY/1000 | Events | IR (95% CI)       |
| <b>TD<sup>§</sup></b>                                                                                                   | - All continuous treatment time            | 8.6     | 34     | 3.93 (2.81-5.50)  |
|                                                                                                                         | -1 Year continuous treatment               | 8.5     | 34     | 4.01 (2.86-5.61)  |
|                                                                                                                         | - 6 Months continuous treatment            | 8.0     | 31     | 3.90 (2.74-5.54)  |
|                                                                                                                         | -3 Months continuous treatment             | 6.7     | 26     | 3.90 (2.66-5.73)  |
| <b>IM<sup>&amp;</sup></b>                                                                                               | -All continuous treatment time             | 13.3    | 34     | 2.55 (1.82-3.57)  |
|                                                                                                                         | -1 Year continuous treatment               | 12.2    | 34     | 2.78 (1.99-3.89)  |
|                                                                                                                         | - 6 Months continuous treatment            | 10.2    | 26     | 2.56 (1.74-3.76)  |
|                                                                                                                         | -3 Months continuous treatment             | 7.1     | 19     | 2.66 (1.70-4.17)  |
| § IR = 3.41 for current-use of TD in the primary analysis,<br>& IR = 3.50 for current-use of IM in the primary analysis |                                            |         |        |                   |
| <b>VTE</b>                                                                                                              | Continuous treatment time                  | PY/1000 | Events | IR (95% CI)       |
| <b>TD<sup>~</sup></b>                                                                                                   | -All continuous treatment time             | 8.6     | 28     | 3.24 (2.24-4.69)  |
|                                                                                                                         | -1 Year continuous treatment               | 8.5     | 28     | 3.30 (2.28-4.78)  |
|                                                                                                                         | - 6 Months continuous treatment            | 8.0     | 28     | 3.52 (2.43-5.10)  |
|                                                                                                                         | -3 Months continuous treatment             | 6.7     | 26     | 3.90 (2.66-5.73)  |
| <b>IM<sup>^</sup></b>                                                                                                   | All Continuous treatment time              | 13.3    | 39     | 2.92 (2.14-4.00)  |
|                                                                                                                         | -1 Year continuous treatment               | 12.2    | 37     | 3.03 (2.19-4.18)  |
|                                                                                                                         | - 6 Months continuous treatment            | 10.2    | 35     | 3.44 (2.47-4.80)  |
|                                                                                                                         | -3 Months continuous treatment             | 7.1     | 20     | 2.80 (1.81-4.34)  |
| ~ IR = 2.76 for current-use of TD in the primary analysis<br>^IR = 3.17 for current-use of IM in the primary analysis   |                                            |         |        |                   |

<sup>#</sup>Incidence rates were those associated with testosterone initiation during continuous monotherapy treatment with testosterone. Subjects were censored at the end of the initial period of continuous testosterone treatment or if they switched to a different testosterone formulation.

**Table S5. Criteria for Composite Cardiovascular Endpoint in Different Studies**

|                         | MI <sup>&amp;</sup> | VTE <sup>+</sup> | Stroke                    | TIA <sup>^</sup> | Unstable<br>angina | Re-<br>Vascularization<br>Procedures | SCD <sup>#</sup> | Total<br>mortality |
|-------------------------|---------------------|------------------|---------------------------|------------------|--------------------|--------------------------------------|------------------|--------------------|
| Vigen <sup>4</sup>      | x                   |                  | Ischemic                  |                  |                    |                                      |                  | x                  |
| Anderson <sup>18</sup>  | x                   |                  | Ischemic &<br>hemorrhagic |                  |                    |                                      |                  | x                  |
| Wallis <sup>12</sup>    | x                   | x                | Ischemic                  |                  |                    |                                      |                  |                    |
| Layton <sup>9</sup>     | x                   |                  | Ischemic                  | x                | x                  |                                      |                  |                    |
| Cheetham <sup>19</sup>  | x                   |                  | Ischemic                  | x                | x                  | x                                    | x                |                    |
| Argalious <sup>25</sup> | x                   | x                | Ischemic &<br>hemorrhagic |                  |                    |                                      |                  | x*                 |
| Loo <sup>14</sup>       | x                   |                  | Ischemic                  | x                |                    |                                      |                  |                    |

&MI: myocardial infarction

\*Mortality defined as post-operative, in-hospital mortality

#SCD: sudden cardiac death

<sup>^</sup>TIA: transient ischemic attack

<sup>+</sup>VTE: venous thromboembolism consisting of deep vein thrombosis (DVT) and pulmonary embolism (PE)
